# Supplementary material
Source: PubMed Central journal article supplement (PMC2533811)

## Supplemental Material

### **Supplemental Methods**

#### **LC-MS analysis of PGE<sub>2</sub> in colon**

Colon epithelial cells were homogenized in 1 × PBS and 2 equivalent volumes of acetone were added and incubated with shaking for 10 minutes. The samples were centrifuged and supernatants were dried under vacuum centrifugation. The samples and purified PGE<sub>2</sub> (Cayman Chemical, Ann Arbor, MI) were suspended in 60% acetonitrile. The samples were injected into an UPLC-QTOFMS system (Waters, Mildford, MA) and separated using an Acquity UPLC™ BEH C<sub>18</sub> column (Waters). Standard curve with linear range from 20 to 1000 nM of PGE<sub>2</sub> ( $r = 0.99$ ) was achieved by using dynamic range enhancement (DRE) function of QTOF Premier. PGE<sub>2</sub> concentrations were determined by the integration of peak area and fitting with standard curve.

#### **Nimesulide treatment**

Nimesulide (Sigma, St. Louis, MO) was suspended in corn oil and delivered to the mouse via gavage at 20mg/kg and corn oil only was used as vehicle.

### Supplemental Figure Legends

**Supplemental Figure 1 Pro-inflammatory gene expression in *Vhl*<sup>F/F</sup> and *Vhl*<sup>ΔIE</sup> mice following nimesulide administration.** (A) Representative overlaid chromatograms from colon extracts *Vhl*<sup>F/F</sup> and *Vhl*<sup>ΔIE</sup> mice; inset consist of a chromatogram from purified PGE<sub>2</sub>. (B) Quantitation of PGE<sub>2</sub> levels. (C) qPCR analysis of pro-inflammatory mediators in the colon epithelium from *Vhl*<sup>F/F</sup> and *Vhl*<sup>ΔIE</sup> mice treated with vehicle or 20mg/kg of nimesulide.

**Supplemental Figure 2 Hif-1α and Hif-2α expression following 1, 3, 5, and 7 day DSS treatment.** (A) Western blot analysis measuring HIF-1α or HIF-2α expression in colon epithelial cells from wild-type mice treated with DSS for 1, 3, 5, and 7 days. (B) qPCR analysis of HIF target genes in colon epithelial cells from wild-type mice treated with DSS for 1, 3, 5, and 7 days. Expression was normalized to β-actin and each bar represents the mean value ± S.D. (†)= *P*<.01 compared to control treated mice.

## Supplemental Figure 1

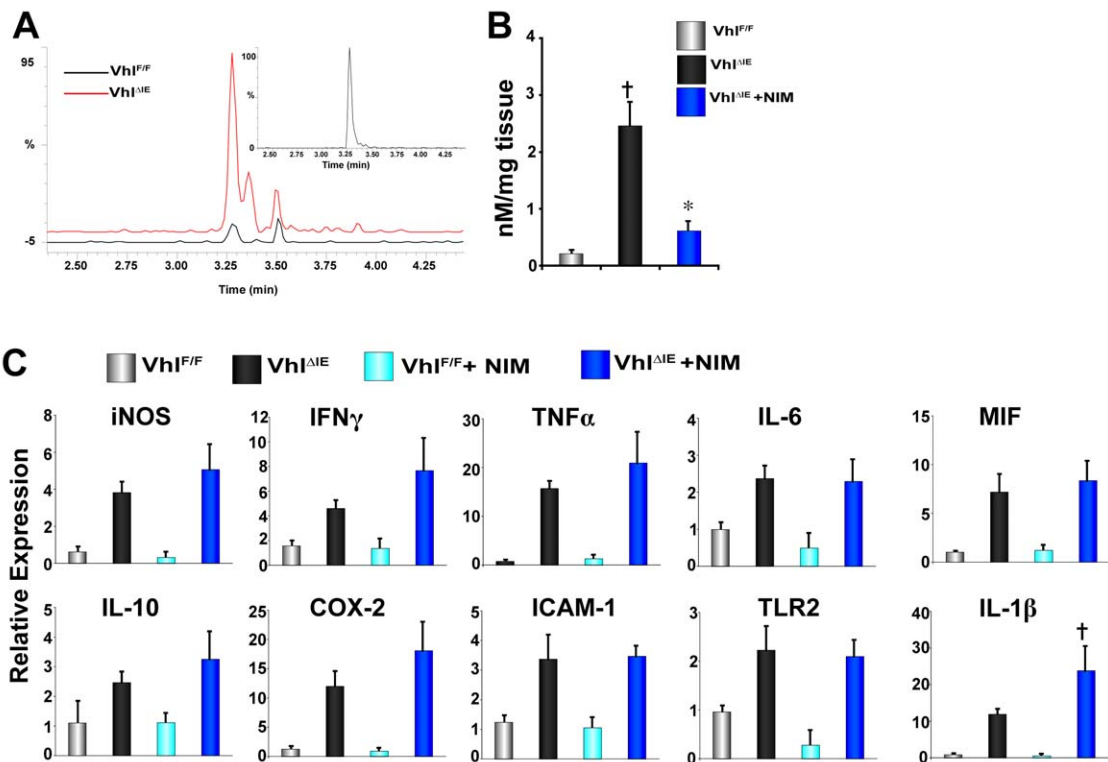

# Supplemental Figure 1

**A**

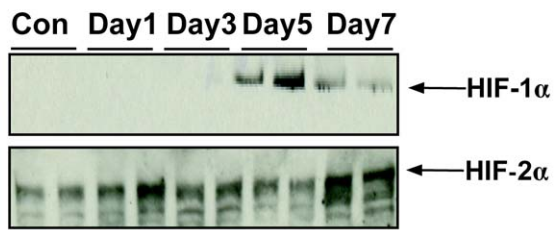

**B**

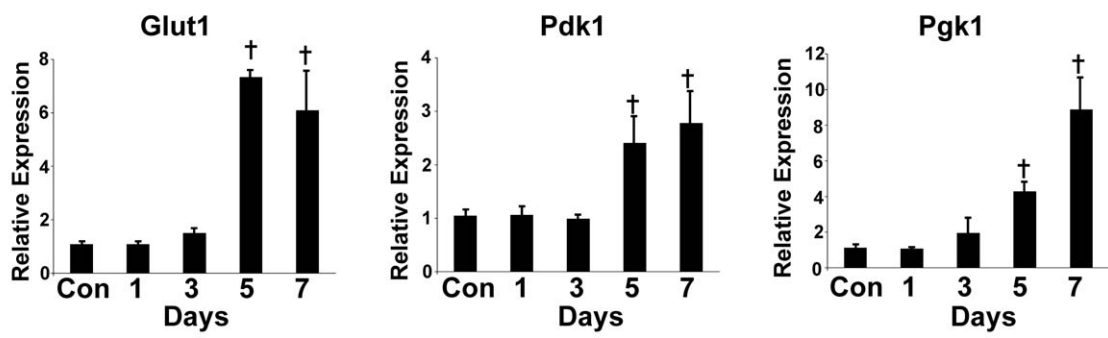

Supplement: NIHMS58841-supplement-01.pdf [file NIHMS58841-supplement-01.pdf]
